# Supplementary material for: Royal Jelly Delays Motor Functional Impairment During Aging in Genetically Heterogeneous Male Mice
Source: PubMed Central journal article supplement (PMC6164577; doi:10.3390/nu10091191), 2018-09-01
Supplement: nutrients-10-01191-s001.pdf [file nutrients-10-01191-s001.pdf]

# Royal Jelly Delays Motor Functional Impairment During Aging in Genetically Heterogeneous Male Mice

## Authors:

Nobuaki Okumura<sup>1</sup>, Toshihiko Toda<sup>2</sup>, Yusuke Ozawa<sup>2</sup>, Kenji Watanabe<sup>2</sup>, Tomoki Ikuta<sup>1</sup>, Tomoki Tatefuji<sup>1</sup>, Ken Hashimoto<sup>1</sup>, Takahiko Shimizu<sup>2</sup>

**Table S1.** General composition of the experimental diets.

| Diets            | Control<br>(Cont.) | 0.05% NRJ<br>(NRJL) | 0.5% NRJ<br>(NRJH) | 0.05% ERJ<br>(ERJL) | 0.5% ERJ<br>(ERJH) |
|------------------|--------------------|---------------------|--------------------|---------------------|--------------------|
| Moisture (%)     | 7.9                | 7.9                 | 7.9                | 7.9                 | 7.9                |
| Protein (%)      | 23.1               | 23.1                | 23.1               | 23.1                | 23.1               |
| Lipid (%)        | 5.1                | 5.1                 | 5.1                | 5.1                 | 5.1                |
| Ash (%)          | 5.8                | 5.8                 | 5.8                | 5.8                 | 5.8                |
| Carbohydrate (%) | 58.1               | 58.1                | 58.1               | 58.1                | 58.1               |
| Energy (kcal)    | 359.0              | 359.0               | 359.2              | 359.0               | 359.1              |

**Table S2.** Effects of RJ on plasma biochemical parameters.

| Parameter       | 10 months   |              | 24 months   |             |
|-----------------|-------------|--------------|-------------|-------------|
|                 | Control     | Control      | NRJH        | ERJH        |
| Albumin (g/dL)  | 2.9 ± 0.23  | 2.9 ± 0.79   | 2.6 ± 0.11  | 2.5 ± 0.17  |
| AST (U/L)       | 74.4 ± 27.7 | 102.8 ± 63.6 | 81.6 ± 27.6 | 71.8 ± 15.2 |
| ALT (U/L)       | 27.8 ± 4.3  | 49.6 ± 49.7  | 25.0 ± 9.3  | 19.6 ± 2.9  |
| T-CHO (mg/dL)   | 135 ± 27.7  | 134 ± 126.3  | 102 ± 33.7  | 68 ± 12.9 * |
| TG (mg/dL)      | 71 ± 30.6   | 38 ± 11.4    | 32 ± 8.7    | 30 ± 12.2 * |
| Glucose (mg/dL) | 78.2 ± 6.5  | 75.4 ± 7.7   | 73.2 ± 5.7  | 86.9 ± 7.1  |

Mean ± SEM. \*  $P < 0.05$  vs 10 months, control

**Table S3.** Effects of RJ on the number of blood cells.

| Parameter | 10 months         |                   | 24 months          |                    |                   |                   |                   |
|-----------|-------------------|-------------------|--------------------|--------------------|-------------------|-------------------|-------------------|
|           | Control           | Control           | NRJL               | NRJH               | ERJL              | ERJH              |                   |
| WBC       | $\times 10^2$ /ml | 11.4<br>$\pm 6.2$ | 57.8<br>$\pm 36.3$ | 16.5<br>$\pm 11.2$ | 8.2<br>$\pm 4.7$  | 9.4<br>$\pm 6.1$  | 5.4<br>$\pm 3.7$  |
| RBC       | $\times 10^4$ /ml | 977<br>$\pm 36$   | 839<br>$\pm 55$    | 930<br>$\pm 150$   | 872<br>$\pm 55$   | 869<br>50         | 797<br>$\pm 30$   |
| HGB       | g/dL              | 12.6<br>$\pm 0.5$ | 10.3<br>$\pm 0.6$  | 11.4<br>$\pm 1.9$  | 10.8<br>$\pm 0.6$ | 11.0<br>$\pm 0.5$ | 10.3<br>$\pm 0.5$ |
| HCT       | %                 | 47.6<br>$\pm 2.0$ | 38.8<br>$\pm 2.3$  | 43.0<br>$\pm 6.6$  | 41.0<br>$\pm 2.1$ | 41.1<br>$\pm 2.1$ | 37.8<br>$\pm 1.5$ |
| MCV       | fL                | 48.8<br>$\pm 1.3$ | 46.5<br>$\pm 1.2$  | 46.5<br>$\pm 0.7$  | 47.2<br>$\pm 0.6$ | 47.4<br>$\pm 0.5$ | 47.4<br>$\pm 0.8$ |
| MCH       | Pg                | 12.9<br>$\pm 0.4$ | 12.4<br>$\pm 0.3$  | 12.2<br>$\pm 0.2$  | 12.5<br>$\pm 0.2$ | 12.7<br>$\pm 0.2$ | 12.9<br>$\pm 0.3$ |
| MCHC      | g/dL              | 26.5<br>$\pm 0.3$ | 26.7<br>$\pm 0.3$  | 26.2<br>$\pm 0.4$  | 26.3<br>$\pm 0.3$ | 26.8<br>$\pm 0.5$ | 27.2<br>$\pm 0.6$ |
| PLT       | $\times 10^4$ /ml | 121<br>$\pm 7.2$  | 132<br>$\pm 22.3$  | 122<br>$\pm 18.6$  | 144<br>$\pm 6.8$  | 132<br>$\pm 3.3$  | 140<br>$\pm 8.9$  |

Mean  $\pm$  SEM

**Table S4.** Sequences of primers used in this study.

| Gene                           | Symbol    | Accession No. |   | Sequence (5' > 3')       | Product length |
|--------------------------------|-----------|---------------|---|--------------------------|----------------|
| Tripartite motif-containing 63 | MuRF1     | NM_001039048  | F | gccatcctggacgagaagaa     | 234            |
|                                |           |               | R | cagctggcagcccttggga      |                |
| F-box protein 32               | Atrogin-1 | NM_026346     | F | agaccggctactgtggaagag    | 217            |
|                                |           |               | R | ccgtgcatggatggctcagtg    |                |
| Myogenic differentiation 1     | Myod      | NM_010866     | F | ggctacgacaccgcctacta     | 110            |
|                                |           |               | R | gtggagatgcgtccactat      |                |
| Paired box 7                   | Pax7      | NM_011039     | F | gacgacgaggaaggagacaa     | 110            |
|                                |           |               | R | acatctgagccctcatccag     |                |
| Myogenin                       | Myog      | NM_031189     | F | ccttgctcagctccctca       | 94             |
|                                |           |               | R | tgggagttgcattcactgg      |                |
| Myostatin                      | Mstn      | NM_010834     | F | ctgtaacctcccaggacca      | 197            |
|                                |           |               | R | tctttgggtgcgataatcc      |                |
| Beta-2 microglobulin           | B2m       | NM_009735     | F | ctggctcacactgaattcacc    | 104            |
|                                |           |               | R | atgtctcgatcccagtagacgg   |                |
| Actin, beta                    | Actb      | NM_007393     | F | ttcttgggtatggaatcctgtggc | 85             |
|                                |           |               | R | agaggcttttacggatgtcaacg  |                |
| histone cluster 2, H2aa1       | H2a       | NM_013549     | F | acgaggagctcaacaagctg     | 105            |
|                                |           |               | R | tatggtggctctccgtcttc     |                |
| Glucuronidase, beta            | Gurb      | NM_010368     | F | tgaacgggaagcaatcctgc     | 133            |
|                                |           |               | R | acctccctcatgtccaccac     |                |
| Ribosomal protein S18          | Rsp18     | NM_011296     | F | gatgggcgcgaaaatagc       | 107            |
|                                |           |               | R | gccctcttggtaggtcgat      |                |

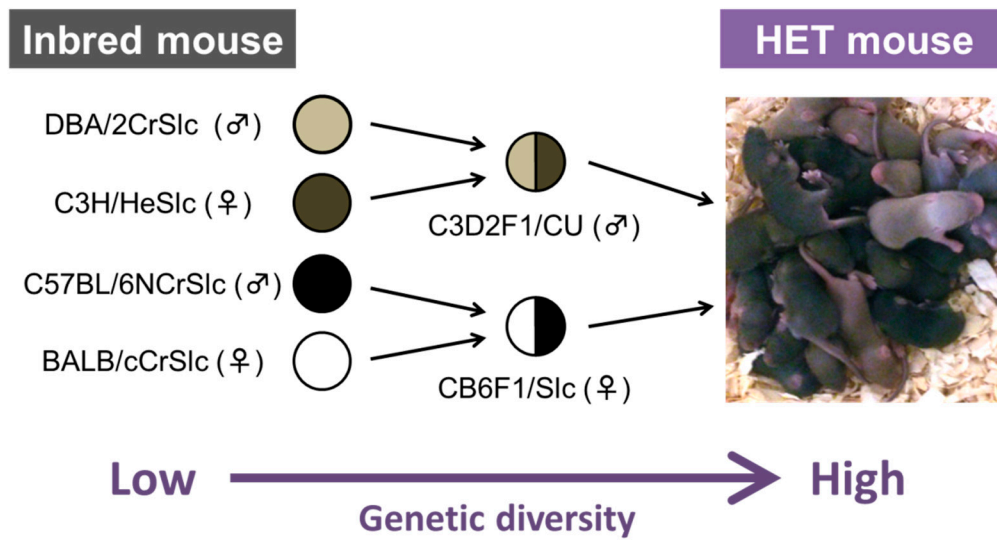

**Figure S1.** Generation of genetically heterogeneous (HET) mice.

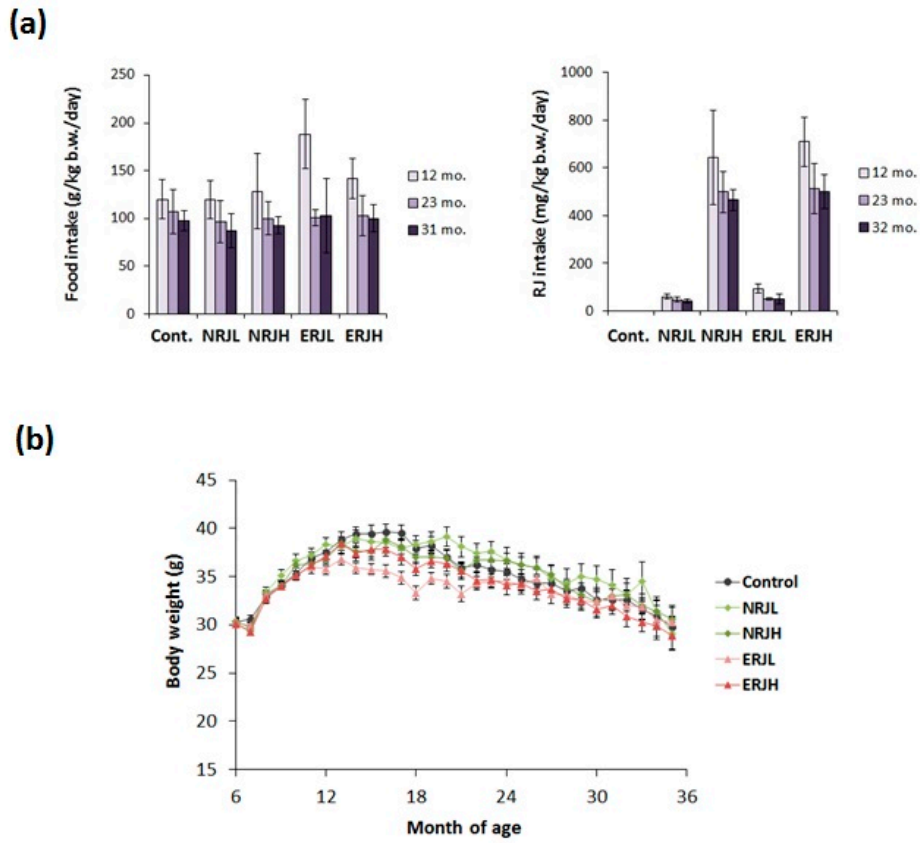

**Figure S2.** Changes in food intake and body weight with aging in genetically heterogeneous male mice. (a) Changes in the food intake and RJ intake during the experiments. The food intake (left) was measured at 12, 23, and 31 months of age. The daily RJ intake was calculated from the food consumption. The data are shown as the mean  $\pm$ SD ( $n = 5$ ). (b), The effects of royal jelly on the body weight. The body weight of mice alive at each time point was measured every month. The data are shown as the mean  $\pm$ SD.

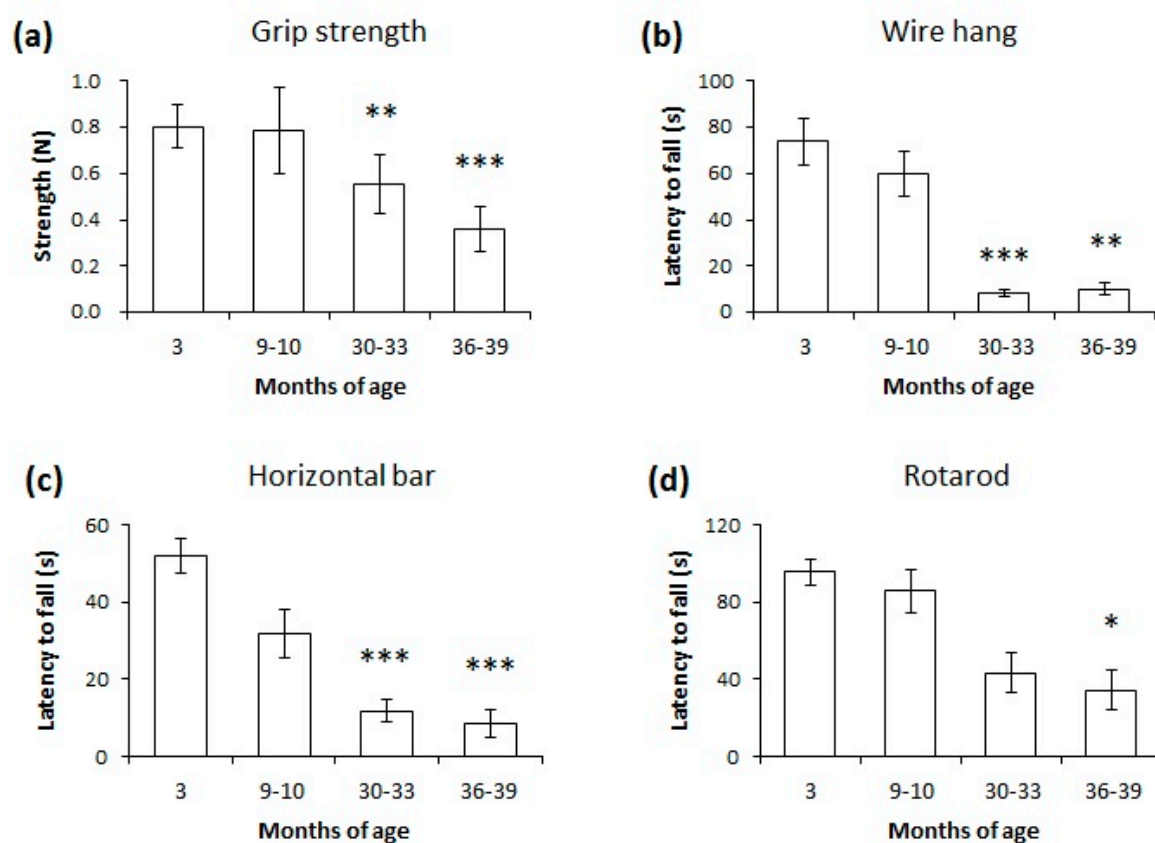

**Figure S3.** Changes in the motor functions during aging in HET mice. Grip strength was measured by a spring gauge test (a) and a wire hang test (b). Locomotor activity was measured by a horizontal bar test (c) and an accelerated rotarod test (d). Data are shown as the mean  $\pm$  SEM. \*\*  $P < 0.01$  and \*  $P < 0.05$  vs. 3 months.

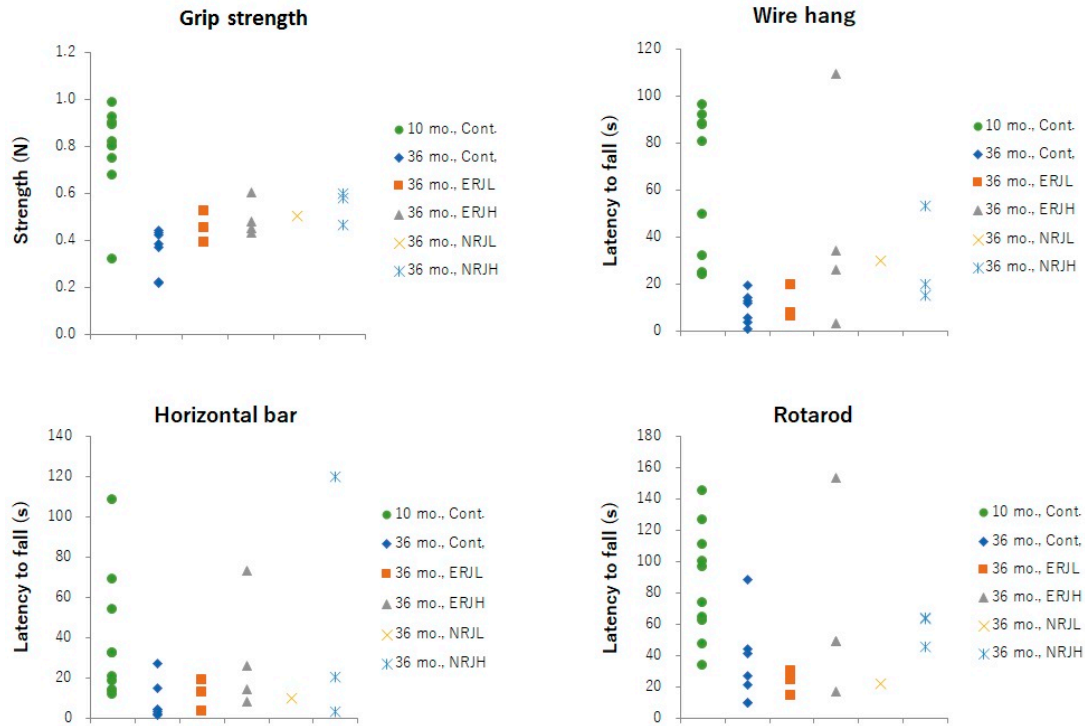

**Figure S4. Effect of royal jelly on the motor functions at 36–39 months of age in HET mice.** The motor functions of mice at 36–39 months of age (indicated as 36 mo. in the figure) were measured by different physical performance tests. The grip strength was measured by a spring gauge test (Grip strength) and a wire hang test (Wire hang). The locomotor activity was measured by a horizontal bar test (Horizontal bar) and an accelerated rotarod test (Rotarod). Each plot shows the results from individual mice.



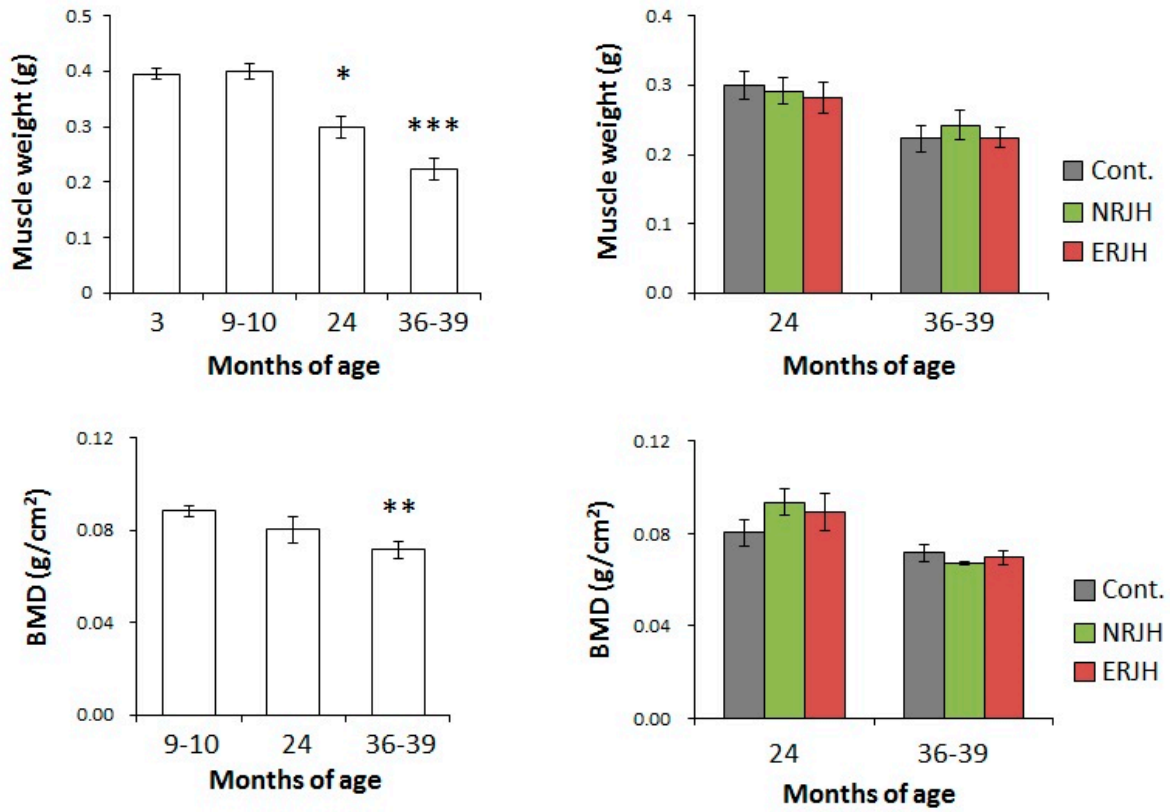

**Figure S5.** Changes in the muscle weight and bone mineral density during aging in HET mice. The upper panels show the muscle weight at each time point. Data are shown as the mean  $\pm$  SEM. \*\*\*  $P < 0.001$ , \*\*  $P < 0.01$  and \*  $P < 0.05$  vs. 3 months. The lower panels show the bone mineral density (BMD). Data are shown as the mean  $\pm$  SEM. \*\*\*  $P < 0.001$ , \*\*  $P < 0.01$  and \*  $P < 0.05$  vs. 9-10 months.
